# Supplementary material
Source: PubMed Central journal article supplement (PMC4091147)
Supplement: auto-10-588-s01.pdf [file auto-10-588-s01.pdf]

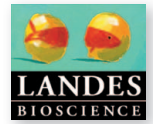

## **Supplemental Material to:**

**Xiaojie Zhang, Sheng Chen, Lin Song, Yu Tang, Yufei Shen,  
Li Jia, and Weidong Le**

**MTOR-independent, autophagic enhancer trehalose  
prolongs motor neuron survival and ameliorates the  
autophagic flux defect in a mouse model of amyotrophic  
lateral sclerosis**

**Autophagy 2014; 10(4)**

**<http://dx.doi.org/10.4161/auto.27710>**

**[www.landesbioscience.com/journals/autophagy/article/27710](http://www.landesbioscience.com/journals/autophagy/article/27710)**

**A**

|              | Primer  |                                   |
|--------------|---------|-----------------------------------|
| <i>Sod1</i>  | Forward | 5'-TGAAGA GAG GCA TGT TGG AGAC-3' |
|              | Reverse | 5'-TTC CAC CTT TGC CCAAGT CA-3'   |
| <i>Actin</i> | Forward | 5'-CAC CCG CGA GCA CAG CTT CT-3'  |
|              | Reverse | 5'-TTT GCA CAT GCC GGA GCC GT-3'  |

**B**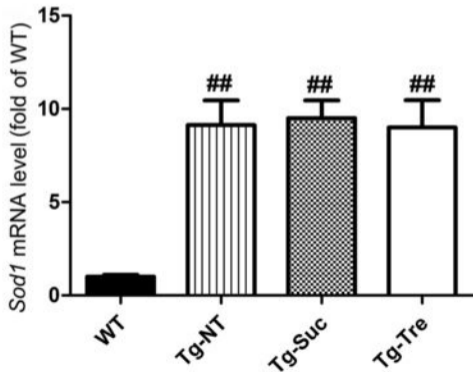

## Supplemental figure legend

**Figure S1.** Effects of trehalose on mRNA level of the *Sod1* gene in SOD1<sup>G93A</sup> mice. **(A)** Primers used in real-time PCR tests. **(B)** Quantitative analysis of the mRNA levels of the *Sod1* gene in the spinal cord tissues of WT, Tg-NT, Tg-Suc and Tg-Tre mice. Four mice in each group. Data were analyzed using one-way ANOVA followed by Tukey *post hoc* test. Values are presented as mean  $\pm$  S.E.M. <sup>##</sup>*P* < 0.01 as compared with WT mice.
